1 **Title**

2 **Working memory capacity of crows and monkeys**  
3 **arises from similar neuronal computations**

4 Lukas Alexander Hahn<sup>1</sup>, Dmitry Balakhonov<sup>1</sup>, Erica Fongaro<sup>1</sup>, Andreas Nieder<sup>2</sup> & Jonas Rose<sup>1</sup>

5 <sup>1</sup> *Neural Basis of Learning, Institute of Cognitive Neuroscience, Faculty of Psychology, Ruhr University Bochum, 44801 Bochum,*  
6 *Germany*

7 <sup>2</sup> *Animal Physiology, Institute of Neurobiology, University of Tübingen, 72076 Tübingen, Germany*

8 **Keywords**

9 Divisive normalization; computation principle; working memory capacity; capacity limitation;  
10 single-cell recordings; NCL; PFC; comparative cognition; flexible model of WM

11

12 **Abstract**

13 Complex cognition relies on flexible working memory, which is severely limited in its capacity. The  
14 neuronal computations underlying these capacity limits have been extensively studied in humans  
15 and in monkeys, resulting in competing theoretical models. We probed the working memory  
16 capacity of crows (*Corvus corone*) in a change detection task, developed for monkeys (*Macaca*  
17 *mulatta*), while we performed extracellular recordings of the prefrontal-like area nidopallium  
18 caudolaterale. We found that neuronal encoding and maintenance of information were affected  
19 by item load, in a way that is virtually identical to results obtained from monkey prefrontal cortex.  
20 Contemporary neurophysiological models of working memory employ divisive normalization as  
21 an important mechanism that may result in the capacity limitation. As these models are usually  
22 conceptualized and tested in an exclusively mammalian context, it remains unclear if they fully  
23 capture a general concept of working memory or if they are restricted to the mammalian  
24 neocortex. Here we report that carrion crows and macaque monkeys share divisive normalization  
25 as a neuronal computation that is in line with mammalian models. This indicates that  
26 computational models of working memory developed in the mammalian cortex can also apply to  
27 non-cortical associative brain regions of birds.

28

## 29 Introduction

30 Working memory (WM) can hold information for a short period of time to allow further processing  
31 in the absence of sensory input ([Cowan, 2017](#); [Oberauer et al., 2018](#)). By bridging this gap  
32 between the immediate sensory environment and behavior, WM is a keystone for complex  
33 cognition. It is a very flexible memory system, yet severely limited in its capacity. While this  
34 capacity is often seen as a general cognitive bottleneck, for simple stimuli, like colors, the capacity  
35 is very similar between humans, monkeys, and crows ([Balakhonov and Rose, 2017](#); [Buschman](#)  
36 [et al., 2011](#); [Cowan, 2001](#); [Luck and Vogel, 1997](#)).

37 Different models have been proposed to conceptualize how this capacity limit arises. This work  
38 motivated many psychophysical and electrophysiological experiments that in turn led to a  
39 spectrum of more refined models of WM ([Ma et al., 2014](#)). ‘Discrete models’ of WM argue that a  
40 fixed number of items can be stored. Once this capacity is reached, an additional item can only  
41 be maintained if it replaces a previous item ([Awh et al., 2007](#); [Fukuda et al., 2010](#); [Luck and Vogel,](#)  
42 [1997](#); [Vogel and Machizawa, 2004](#); [Zhang and Luck, 2008](#)). ‘Continuous models’ describe WM  
43 as a flexible resource that is allocated to individual items. A minimum amount of this resource has  
44 to be allocated to each item for successful retention, thereby resulting in a capacity limit ([Bays](#)  
45 [and Husain, 2008](#); [Berg et al., 2012](#); [Wilken and Ma, 2004](#)).

46 On the neurophysiological level, models of WM capacity suggest that interference between  
47 memory representations (‘items’) within the neuronal network is a source of information loss and  
48 capacity limitation ([Bouchacourt and Buschman, 2019](#); [Lundqvist et al., 2016, 2011](#); [Schneegans](#)  
49 [et al., 2020](#)). Interference may arise due to divisive normalization that appears as competition  
50 between items, related to oscillatory dynamics ([Lundqvist et al., 2016, 2011](#)), WM flexibility  
51 ([Bouchacourt and Buschman, 2019](#)), and neuronal information sampling ([Schneegans et al.,](#)  
52 [2020](#)). Divisive normalization is a computational principle that acts upon neurons when presenting  
53 multiple stimuli simultaneously, it normalizes neuronal responses by creating ‘a ratio between the  
54 response of an individual neuron and the summed activity of a pool of neurons’ ([Carandini and](#)  
55 [Heeger, 2012, p. 51](#)). An effect related to divisive normalization can be observed when two stimuli  
56 are presented either individually or simultaneously within the receptive field of a visual sensory  
57 neuron. The neuron’s firing rate when the stimuli are presented simultaneously becomes  
58 normalized by the populations’ responses to each individual stimulus ([Carandini et al., 1997](#);  
59 [Heeger, 1992](#)). This effect also occurs in relation to attentive processes ([Reynolds et al., 1999](#);  
60 [Reynolds and Heeger, 2009](#)). Normalization of neuronal responses is commonly observed in  
61 many species throughout the animal kingdom, not just in sensory, but also in cognitive domains

62 ([Carandini and Heeger, 2012](#)).

63 Investigations into WM capacity and model predictions focus mostly on humans and monkeys.  
64 By extending this work to include birds, one can gain a unique comparative perspective. Crows  
65 have a similar limit in WM capacity and neuronal correlates of WM are comparable to monkeys'  
66 ([Balakhonov and Rose, 2017](#); [Nieder, 2017](#)). But while the neuronal architecture of sensory areas  
67 is similar between birds and mammals, higher associative areas, critical for WM, do not share a  
68 common architecture between the species ([Stacho et al., 2020](#)). Therefore, an outstanding  
69 question is whether modern models of WM such as the 'flexible model' capture WM capacity in  
70 general, or if their predictions (e.g., divisive normalization) are confined to the mammalian  
71 neocortex. To resolve this, it is crucial to investigate the avian brain to understand how its different  
72 organization can produce such similar behavioral and neurophysiological results. While the  
73 neuronal correlates of WM maintenance in birds have been investigated in some detail ([Diekamp  
74 et al., 2002](#); [Hartmann et al., 2018](#); [Rinnert et al., 2019](#); [Rose and Colombo, 2005](#); [Veit et al.,  
75 2014](#)), a neurophysiological investigation of WM capacity limitation is still lacking. The avian  
76 forebrain structure, *nidopallium caudolaterale* (NCL) is a critical component of avian WM. The  
77 NCL is considered functionally equivalent to the mammalian prefrontal cortex (PFC) ([Güntürkün  
78 and Bugnyar, 2016](#); [Nieder, 2017](#)), as it receives projections from all sensory modalities ([Kröner  
79 and Güntürkün, 1999](#)), projects to premotor areas ([Kröner and Güntürkün, 1999](#)), and is a target  
80 of dopaminergic innervation ([Waldmann and Güntürkün, 1993](#)).

81 To investigate the neurophysiology of WM capacity in birds, we adopted a task design developed  
82 for monkeys ([Buschman et al., 2011](#)) to use it with carrion crows (*Corvus corone*). Our animals  
83 were trained to memorize an array of colors and to indicate which color had changed after a short  
84 memory delay, while we performed extracellular recordings of individual neurons in the NCL using  
85 multichannel probes. We expected to find a clear correlate of WM representations in NCL neurons  
86 and a load-dependent response modulation based on divisive normalization of neuronal  
87 responses. This would allow us to evaluate if the behavioral WM capacity observations of crows  
88 fit a 'discrete' or 'continuous' WM resource model. If the neuronal responses also fit the  
89 contemporary neurophysiological models of WM capacity limitations ([Bouchacourt and  
90 Buschman, 2019](#); [Lundqvist et al., 2016, 2011](#); [Schneegans et al., 2020](#)) it would further suggest  
91 that crows and monkeys have convergently evolved a similar neurophysiological basis for WM  
92 capacity despite a different architecture of the critical forebrain structures.

93

94

## 95 **Materials and Methods**

### 96 **Subjects.**

97 Two hand-raised carrion crows (*Corvus corone*) of 2 years of age served as subjects in this study.  
98 The birds were housed in spacious aviaries in social groups. During the experimental procedures,  
99 the animals were held on a controlled food protocol with *ad libitum* access to water and grit. All  
100 experimental procedures and housing conditions were carried out in accordance with the National  
101 Institutes of Health *Guide for Care and Use of Laboratory Animals* and were authorized by the  
102 national authority (*Regierungspräsidium*).

### 103 **Experimental setup.**

104 We used operant training chambers (50 x 50.5 x 77.5 cm, width x depth x height) equipped with  
105 an acoustic pulse touchscreen (22", ELO 2200 L APR, Elo Touch Solutions Inc, USA) and an  
106 infrared camera (Sygonix, Nürnberg, Germany) for remote monitoring. The birds sat on a wooden  
107 perch so that the distance between the bird's eye and the touchscreen was 8 cm. Food pellets  
108 were delivered as a reward via a custom-made automatic feeder (plans available at  
109 [www.jonasrose.net](http://www.jonasrose.net)). The position of the animal's head was tracked online during the experiment  
110 by two open-source computer vision cameras ('Pixy', CMUcam5, Charmed Labs, Texas, USA)  
111 that reported the location and angle between two LEDs. For tracking, we surgically implanted a  
112 lightweight head-post and used a lightweight 3D-printed mount with LEDs that was removed after  
113 each experimental session. The system reported the head-location at a frame rate of 50 Hz and  
114 data was smoothed by integrating over 2 frames in Matlab using custom programs on a control  
115 PC. All experiments were controlled by custom programs in Matlab using the Biopsychology  
116 ([Rose et al., 2008](#)) and Psychophysics toolboxes ([Brainard, 1997](#)). Digital input and output of the  
117 control PC were handled by a microcontroller (ODROID C1, Hardkernel co. Ltd, Anyang, South  
118 Korea) connected through a gigabit network running custom software (available at:  
119 [www.jonasrose.net](http://www.jonasrose.net)).

### 120 **Behavioral protocol.**

121 The behavioral protocol was identical to the one described in (Balakhonov and Rose, 2017). We  
122 trained the birds to perform a delayed change localization task that had previously been used to  
123 test the performance under different working memory loads in primates ([Buschman et al., 2011](#)).  
124 Each trial started after a 2 s inter-trial-interval, with the presentation of a red dot centered on the  
125 touchscreen (for a maximum of 40 s). The animals initiated the trial by centering their head in

126 front of the red dot for 160 ms. This caused the red dot to disappear and a stimulus array of two  
127 to five colored squares to appear (Fig. 1A). The colored squares were presented for a period of  
128 800 ms, during which the animals had to hold their head still and center their gaze on the screen  
129 (no more than 2 cm horizontal or vertical displacement, and no more than 20° horizontal or vertical  
130 rotation). Failure to hold the head in this position resulted in an aborted trial. This sample phase  
131 was followed by a memory delay of 1000 ms after which the stimulus array reappeared with one  
132 color exchanged. The animal had to indicate the location of the color change by pecking the  
133 respective square. Correct responses were rewarded probabilistically (BEO special pellets, in 55  
134 % of correct trials, additional 2 s illumination of the food receptacle in 100 % of correct trials).  
135 Incorrect responses to colors that had not changed or a failure to respond within 4 s resulted in a  
136 brief screen flash and a 10 s timeout.

137 The stimuli were presented at six fixed locations on the screen (1 – 6, Fig. 1A). For each location,  
138 a unique color pair was randomly chosen from a set of 14 colors (two possible pairs of colors  
139 were excluded due to similarity). Thus, during any given experimental session, a random pair of  
140 colors was fixed to each of the six locations. The order of presentation of colors within a pair, the  
141 target location (where the color change occurred), and the number of stimuli in the array (two to  
142 five) were randomized and balanced across trials so that each condition had an equal likelihood  
143 to appear. The color squares had a width of 10 degrees of visual angle (DVA) and were placed  
144 on the horizontal meridian of the screen and at 45.8 DVA above or below the meridian at a  
145 distance of 54 and 55.4 DVA from the center. This arrangement in combination with the head  
146 tracking ensured that all stimuli appeared outside of the binocular visual field of crows (37.6 DVA  
147 (*Troscianko et al., 2012*)).

## 148 **Surgery.**

149 Both animals were chronically implanted with a lightweight head-post to attach a small LED-holder  
150 during the experiments. Before surgery, animals were deeply anesthetized with ketamine (50  
151 mg/kg) and xylazine (5 mg/kg). Once deeply anesthetized, animals were placed in a stereotaxic  
152 frame. After attaching the small head-post with dental acrylic, a microdrive with a multi-channel  
153 microelectrode was stereotactically implanted at the craniotomy (Neuronexus Technologies Inc.,  
154 Ann Arbor MI, DDrive). The electrode was positioned in NCL (AP 5.0, ML 13.0) of the left  
155 hemisphere (coordinates for the region based on histological studies on the localization of NCL  
156 in crows (*Veit and Nieder, 2013*)). After the surgery, the crows received analgesics.

157

## 158 **Electrophysiological recordings.**

159 Extracellular single neuron recordings were performed using chronically implanted multi-channel  
160 microelectrodes. The distance between recording sites was 50  $\mu\text{m}$ . The signal was amplified,  
161 filtered, and digitized using Intan RHD2000 headstages and a USB-Interface board (Intan  
162 Technologies LLC, Los Angeles CA). The system also recorded digital event-codes that were  
163 sent from the behavioral control PC using a custom IO-device (details available at  
164 [www.jonasrose.net](http://www.jonasrose.net)). Before each recording session, the electrodes were advanced manually  
165 using the microdrive. Recordings were started 20 minutes after the advancement, and each  
166 recording site was manually checked for neuronal signals. The signals were recorded at a  
167 sampling rate of 30 kHz and filtered with a band-pass filter at recording (0.5 kHz – 7.5 kHz). The  
168 recorded neuronal signals were not pre-selected for task involvement.

169 We performed spike sorting using the semi-automatic Klusta-suite software ([Rossant et al., 2016](#)),  
170 which uses the high electrode count and their close spacing to isolate signals of single neurons.  
171 For spike sorting, we filtered with a low-pass of 500 Hz and a high pass of 7125 Hz. The software  
172 utilizes the spatial distribution of the recorded signal along the different recording sites to untangle  
173 overlapping signals and separate signals with similar waveforms but different recording depths.

#### 174 **Data analysis.**

175 All statistical analyses were performed in Matlab (2018b, Mathworks Inc.) using commercially  
176 available toolboxes (Curve Fitting Toolbox Version 3.5.3, Statistics and Machine Learning  
177 Toolbox Version 10.2) and custom code. For all statistical tests, we assumed a significance level  
178 of  $\alpha = 0.05$ , unless stated otherwise. Trials were classified as error trials if the bird chose a location  
179 where no change of colors had appeared. Trials in which the bird did not choose any location or  
180 failed to maintain head fixation were not analyzed. All correct trials were included in the analysis  
181 of neural data. Because there were only very few error trials in the load 1 condition, we performed  
182 error trial analysis only for the load 2 and load 3 conditions.

183 The behavioral data were analyzed as described in our previous study ([Balakhonov and Rose, 2017](#)),  
184 estimating the working memory capacity  $K$  for each load by equation 1.

$$185 \text{Equation 1: } K = n * p$$

186 Where  $p$  is the percentage correct and  $n$  is the number of items in working memory. This estimate  
187 has been applied to similar primate data and in studies with humans ([Johnson et al., 2013](#);  
188 [Kornblith et al., 2016](#)).

#### 189 **Information about color identity.**



190 Based on a one-way ANOVA of color identity at a given location, we calculated a percent  
191 explained variance statistic (PEV) to measure the effect size of neuronal modulation. Its main  
192 parameter  $\omega^2$  is a measurement for the percentage to which the tested factor can explain the  
193 variance of the data, and it is calculated from the sum of squares of the effect ( $SS_{effect}$ ) and the  
194 mean squares of the within-group (error) variance ( $MS_{error}$ ) (Eq. 2).

195 Equation 2: 
$$\omega^2 = \frac{SS_{effect} - df * MS_{error}}{SS_{total} + MS_{error}}$$

196 For each neuron, we determined a ‘favorite location’, which was defined as the location with the  
197 highest cumulative PEV, contralateral to the electrode position, across four non-overlapping bins  
198 during the sample phase (bin size 200 ms, advanced in steps of 200 ms, from start till the end of  
199 the sample phase). The significance of calculated effect size values was determined by a  
200 permutation test. We ran the permutation to calculate the likelihood of getting an explained  
201 variance value bigger than the one calculated from the actual distribution of the data by randomly  
202 permuting the color identity labels and calculating the PEV 1000 times. The test thereby does not  
203 assume any distribution of the data and returns an unbiased estimate of the likelihood of  
204 generating an effect size within the data randomly. The measured value of explained variance  
205 from the actual dataset was assumed to be significant if the likelihood of randomly generating a  
206 bigger value was below 5 %.

207 We tested the proportions of significant neurons we found for the different trial phases by  
208 performing a binomial test, assuming a significance level  $\alpha = 0.05$  (Eq. 3).

209 Equation 3: 
$$P(X = i) = B(p_0, n) = \binom{n}{k} p_0^i (1 - p_0)^{n-i}$$

210 Calculating the probability  $P$ , of finding  $X$  significant neurons, given a total amount of  $i$  (362)  
211 neurons, and a probability  $p_0$  of 5 % finding a significance by chance.

## 212 **Population analyses.**

213 We considered neuronal significance (i.e., significant PEV as determined above) for each load  
214 independently. This means, we tested if the PEV of a neuron was significant three times with the  
215 permutation method described above: once for each of the three load conditions. Therefore, we  
216 can report seven groups of significance (Tab. 1, Fig. 3C). Subsequently, we created three pooled  
217 groups (Tab. 1) from all neurons with a significant PEV at each individual load. We used these  
218 pooled groups for the population analyses (Figs. 4 & 5). Neurons of these pooled groups, with a  
219 significant PEV during the sample phase were assigned to the ‘sample-population’, and neurons

220 with a significant amount of information during the memory-delay phase were assigned to the  
 221 ‘delay-population’ (significance criterion: one significant 200 ms bin, at  $\alpha = 0.005$ ). Thus, neurons  
 222 with significant PEV during both the sample and delay phase were included in both  
 223 subpopulations.

224 We corrected for the unequal amount of correct and error trials when comparing information about  
 225 color (PEV) between the trial conditions, by sub-sampling correct trials with the number of error  
 226 trials 1000 times for each neuron. The resulting PEV-values of correct trials were then averaged  
 227 for each neuron, this population of averaged PEV values was then statistically tested against the  
 228 PEV values of error trials (of the same neurons) using a dependent t-test.

229 *Table 1: Overview of significant groups. The ‘+’ denotes that a neuron of the respective group had a significant PEV*  
 230 *in the respective load condition. The ‘-’ denotes that a neuron of the respective group did not have a significant PEV*  
 231 *in the load respective condition. The pooled groups contained only neurons with a ‘+’ for the respective load*  
 232 *condition.*

| Load 1                | Load 2                | Load 3                | Group name         |           |
|-----------------------|-----------------------|-----------------------|--------------------|-----------|
| +                     | -                     | -                     | Load 1 neurons     | Group I   |
| -                     | +                     | -                     | Load 2 neurons     | Group II  |
| -                     | -                     | +                     | Load 3 neurons     | Group III |
| +                     | +                     | -                     | Load 1&2 neurons   | Group IV  |
| +                     | -                     | +                     | Load 1&3 neurons   | Group V   |
| -                     | +                     | +                     | Load 2&3 neurons   | Group VI  |
| +                     | +                     | +                     | Load 1&2&3 neurons | Group VII |
| <b>Pooled group 1</b> | <b>Pooled group 2</b> | <b>Pooled group 3</b> |                    |           |

233

### 234 **Divisive normalization like regularization.**

235 We tested for the presence of divisive normalization using the method of (Reynolds et al., 1999).  
 236 Three conditions were considered: (1) neuronal response to stimulus A, (2) neuronal response to  
 237 stimulus B, and (3) neuronal response to the simultaneity of stimulus A and B. As we wanted to  
 238 relate this to the information about color identity, we selected subsets of the favorite location and  
 239 the additional two ipsilateral locations. To test how the neurons altered their response when  
 240 multiple stimuli were presented simultaneously, we calculated the color selectivity index (SE) and  
 241 the sensory interaction index (SI) of each neuron.

242  $SE_i$  was calculated by subtracting the normalized firing rate for the chosen reference color  $i$  (REF <sub>$i$</sub> )



243 at the neuron's favorite location, from a second color  $j$  ( $PROBE_j$ ) at a different location (ipsilateral  
244 to the favorite location, Eq. 4).

245 Equation 4:  $SE_i = PROBE_j - REF_i$

246 The resulting selectivity index lies between -1 (completely selective for the reference color) and 1  
247 (completely selective for the probe color). SI was calculated (Eq. 5) by subtracting the normalized  
248 firing rate for  $REF_i$  from the normalized firing rate of the combination of  $REF_i$  and  $PROBE_j$  ( $PAIR_{i,j}$ ).

249 Equation 5:  $SI_{i,j} = PAIR_{i,j} - REF_i$

250 This interaction index also lies between -1 (full suppression of reference stimulus by the probe  
251 stimulus) and 1 (full enhancement of the reference stimulus by the probe stimulus). As each of  
252 the three locations had two possible colors, we calculated eight SE and SI indices per neuron and  
253 performed a linear regression for all indices. This is required as each stimulus combination is  
254 informative about the normalization.

255 The effects of divisive normalization were compared between the sample and the delay phase.  
256 Therefore, SE and SI indices were calculated across the entire sample (800 ms) and memory  
257 delay (1000 ms) phase. Neurons with significant information were accordingly identified over the  
258 entire sample and delay as one bin, using the permutation test described in the section  
259 '*information about color identity*'.

## 260 **Hierarchical clustering.**

261 To visualize the different groups of neurons that encoded and maintained information about the  
262 color identity during different phases of the trial we performed a hierarchical clustering analysis in  
263 Matlab on the normalized PEV values of individual neurons throughout the trial. We used a (1 -  
264 correlation) distance metric and an average distance linkage function for a maximum of seven  
265 clusters. The maximum number of clusters was first determined by calculating the clustering for  
266 different amounts of clusters (1 to 10) and subsequently calculating the within-cluster sum-of-  
267 squares. This resulted in a graph that allowed us to visually inspect the tradeoff between cluster  
268 number and fit-improvement, from which we estimated the inflection point (elbow-method). A  
269 cluster number of seven presented the best tradeoff that allowed visualization of the different  
270 groups at an acceptable clustering success. We then ordered the neuron clusters to minimize the  
271 average distance between the clusters in the dendrogram.

272

## 273 Results

### 274 The working memory capacity of crows is similar to that of monkeys.

275 The behavioral performance was influenced by the number of colored squares on the screen. It  
276 significantly decreased with an increasing number of ipsilateral squares (median performances,  
277 load 1: 95.88 %, load 2: 78.31 %, load 3: 58.21 %; Friedman test:  $X^2 = 92.00$ ,  $p < .001$ , Fig. 1B).  
278 We ran a generalized linear model with ipsilateral load (i.e. load of hemi-field where a color  
279 changed), contralateral load (i.e. load of hemi-field without a color change) and their interaction  
280 as predictors for performance ( $R^2_{adj} = .78$ ,  $F(460,456) = 555.00$ ,  $p < .001$ ). We found that the  
281 number of ipsilateral colors significantly reduced performance ( $\beta_{ipsi} = -.177$ ,  $t(459) = -18.00$ ,  $p <$   
282  $.001$ ), whereas the number of contralateral colors did not ( $\beta_{contra} = -.021$ ,  $t(459) = -1.77$ ,  $p = .0772$ ;  
283 Fig. 1C). There was also a significant interaction between ipsilateral and contralateral load ( $\beta = -$   
284  $.024$ ,  $t(458) = -4.28$ ,  $p < .001$ ). We compared this model to a reduced model, where we omitted  
285 the non-significant  $\beta_{contra}$  and found that this reduced model ( $R^2_{adj} = .78$ ,  $F(460,457) = 828.00$ ,  $p <$   
286  $.001$ ) explained the performance equally as well ( $|\Delta LLR| = .0102$ ). Therefore, we conclude that  
287 contralateral load by itself did not significantly affect performance. We calculated the capacity K  
288 (see methods) for all full WM-loads (i.e., two to five items). The capacity K peaks at four items  
289 (mean +/- SEM: 3.05 +/- .038, Supplementary Fig.1). These observations are very similar to  
290 observations made in primates ([Buschman et al., 2011](#)) and fully reproduce our earlier behavioral  
291 findings ([Balakhonov and Rose, 2017](#)).

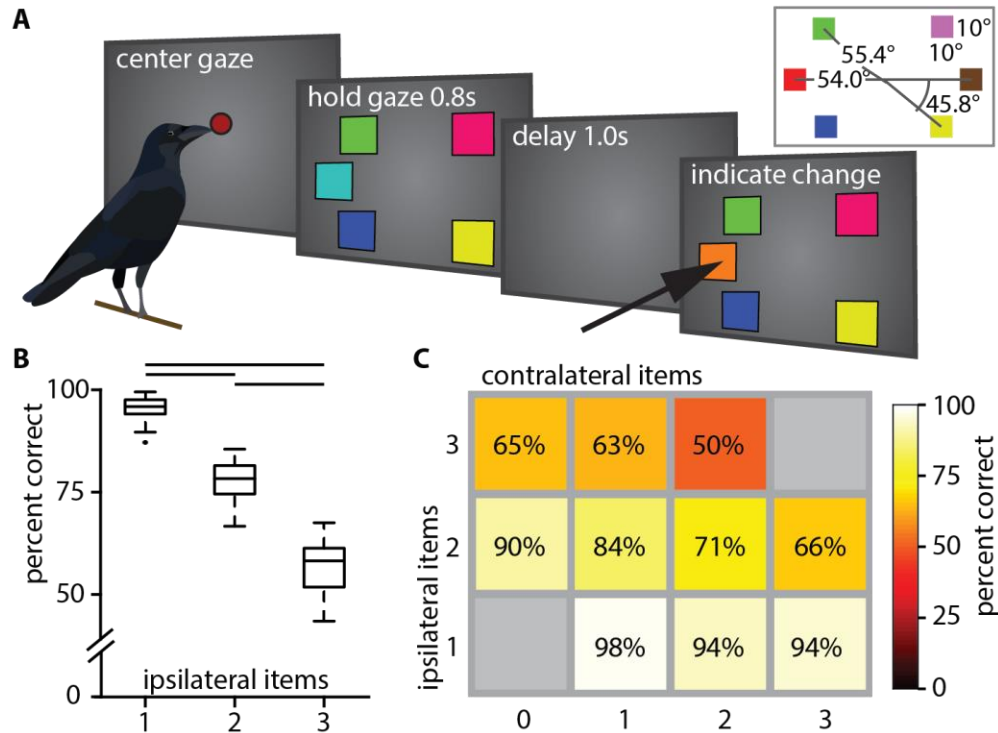

292

293 *Figure 1: (A) Behavioral paradigm (reproduced from Balakhonov & Rose, 2017). (B) Boxplot of performance for different*  
 294 *ipsilateral loads. Horizontal lines indicate significant differences between loads, box indicates the median, 1<sup>st</sup> and 3<sup>rd</sup>*  
 295 *quartile (whiskers extend to 1.5 times the inter-quartile range). (C) Mean performance matrix for ipsi- and contralateral*  
 296 *load combinations. Additional contralateral items at an ipsilateral load of 1 barely affected performance (bottom row).*  
 297 *At higher ipsilateral loads additional contralateral items reduced performance more clearly (middle and top row).*  
 298 *Statistical modeling revealed an interaction at these higher loads (see text).*

## 299 **Neurons of the NCL encode the color identity and maintain it in working memory.**

300 We recorded 362 neurons from the NCL of two crows performing the WM task (delayed change  
 301 localization). All reported effects were also present in each individual bird (Supplementary Figs.  
 302 2 & 3), we, therefore, pooled the data for population analysis. A large subset of neurons  
 303 responded to the presence of a color (i.e. at load 1) by substantially increasing or decreasing their  
 304 firing rate relative to baseline. This change in firing rate occurred selectively, depending on the  
 305 presented color either in the sample (Fig. 2A) or the delay period (Supplementary Fig. 4). For  
 306 most neurons, this difference in firing rate between the two possible colors became attenuated  
 307 when the load increased from one to two colors, and it was further attenuated from two to three  
 308 colors. To quantify this effect, we calculated the amount of information about the color identity at  
 309 a neurons' favorite location as the percent explained variance (PEV) during a memory load of  
 310 one, two, or three items in bins of 200 ms (see methods for details). Most neurons did not sustain  
 311 information about color (measured as a significant PEV, henceforth '*information*') throughout the

312 entire sample or memory delay but rather had shorter periods in which the information was  
 313 significant (Fig. 2A bottom).

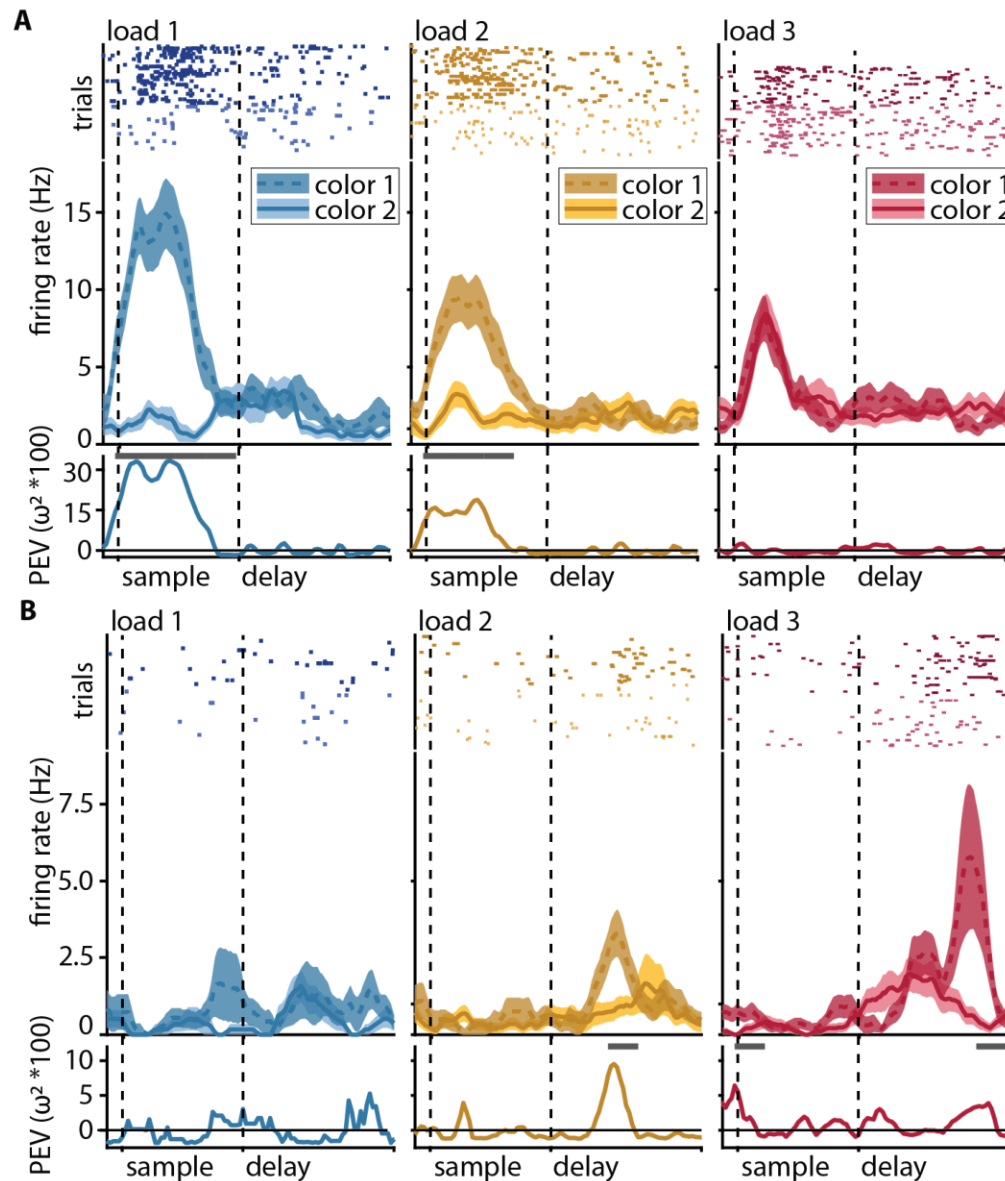

314

315 *Figure 2: Color discrimination in the neuronal response (information, PEV) generally decreases with load, but some*  
 316 *neurons show the opposite effect. (A) Example of a sample neuron with color information decline at load 1 (blue), load*  
 317 *load 2 (yellow), and load 3 (red). Top: raster plot, where every dot represents a single spike during the individual trials (rows*  
 318 *of dots); middle: peri-stimulus-time histogram (PSTH) of average firing rate (solid line for color ID 1, dashed line for*  
 319 *color ID 2) with the standard error of the mean (shaded areas); bottom: percent explained variance of color identity (a*  
 320 *measure of information about color) along the trial, the line at the top of the y-axis indicates significant bins. (B) Same*  
 321 *as in (A) for an example of a delay neuron with information gain at a higher load.*

322 To better capture the time points when the individual neurons carried information, we performed  
323 a hierarchical clustering analysis of the PEV values of the individual neurons at load 1 (see  
324 methods for details). We found a total of seven clusters that were organized into two overarching  
325 groups (Fig. 3A). Group 1 contained neurons ( $n = 227$ ) that showed peak information during the  
326 sample and early delay phase, while group 2 contained neurons ( $n = 135$ ) that showed peak  
327 information during the delay phase. For each neuron, we then calculated if it carried a significant  
328 amount of color information by applying a permutation test (for all bins at load 1, see methods).  
329 The individual neurons were then further classified into three groups depending on the phase in  
330 which they had a significant amount of information (Fig. 3B). Overall, 37.57 % ( $n = 136$ ) of neurons  
331 were significant during the sample phase, 9.39 % ( $n = 34$ ) of neurons were significant during the  
332 memory delay, and 14.64 % ( $n = 53$ ) of neurons were significant during both the sample phase  
333 and the memory delay (all proportions of neurons were significantly higher than expected by  
334 chance (binomial test, see methods, all  $p < .001$ )). Refer to Fig. 2A for an example neuron,  
335 significant at load 1 with a large differentiation in firing rate between color identities (a large PEV)  
336 and a loss of differentiation with increasing ipsilateral load.  
337 Further inspection of individual neuronal activity revealed, however, that a substantial number of  
338 neurons responded differently. Instead of losing information at higher loads, many neurons gained  
339 information (e.g., Fig. 2B, Supplementary Fig. 5). Thus, we additionally performed the permutation  
340 testing for loads 2 and 3 to determine which neurons had significant information (see methods).  
341 We found that many of the neurons that did not have significant information at load 1 did have  
342 significant information at load 2 and load 3 (Fig. 3C). For the memory delay, more than half of the  
343 significant neurons we detected were only significant for either load 2 or load 3, compared to only  
344 36 % of neurons that were significant at load 1 (Fig. 3C middle). By including the higher loads in  
345 our analysis, we found a total of 249 (68.78 %) sample neurons and 94 (25.97 %) delay neurons.  
346 For the population analyses, we subsequently pooled all significant neurons into three groups  
347 (one per load). These pooled groups were then each subdivided into sample and delay neurons  
348 (i.e., 'sample-load1', 'delay-load1', 'sample-load2', etc., see table 1 in the methods for an  
349 overview).

350



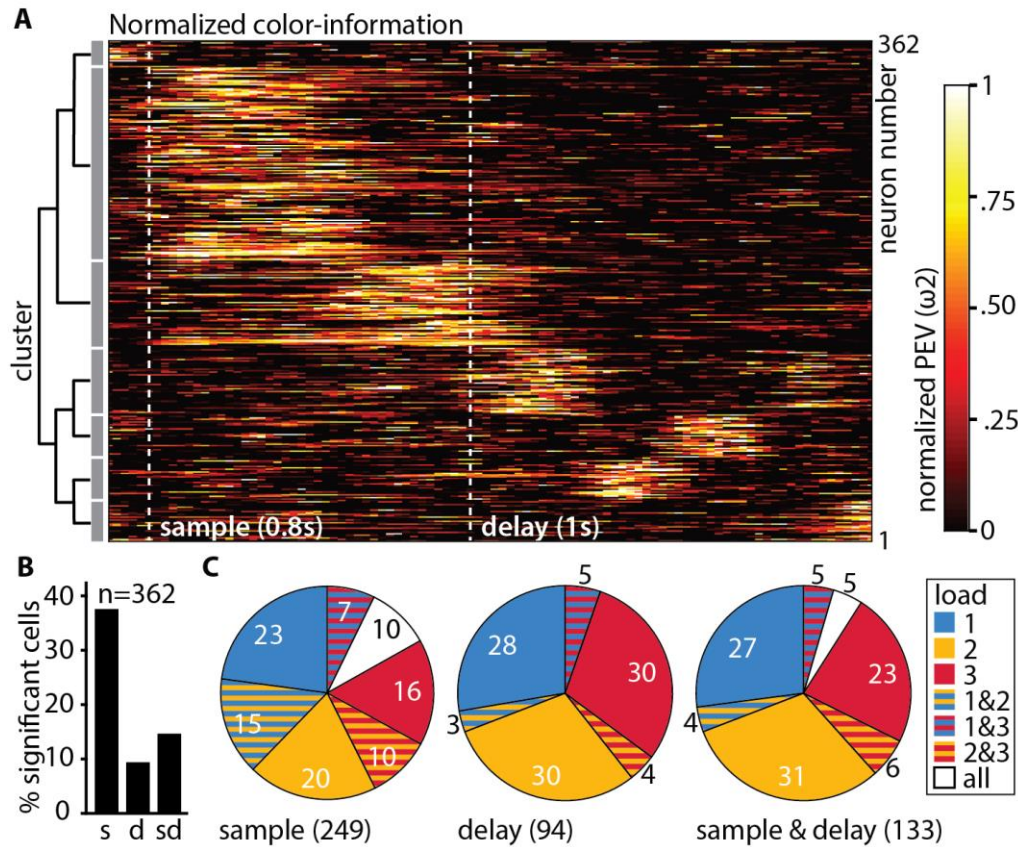

351

352 *Figure 3: (A) The neuronal population can be best described by 7 individual clusters. (B) Percentages of neurons (total*  
353 *n = 362) with significant color information at load 1, during the sample and the delay. (C) Percentages (rounded) of*  
354 *significant neurons in individual load conditions for sample (n = 249), delay (n = 94), and sample & delay (n = 133). The*  
355 *pieces of the pies depicting significance at a specific load relate to the number of significant neurons in the respective*  
356 *phase (e.g. 36 % of the 94 delay neurons (i.e., 34 neurons) are significant at load 1 (all pieces contain blue), these are*  
357 *the same neurons that make up the 9.36 % of the total 362 neurons depicted in B).*

### 358 **The neuronal population has gradually less information with increasing load.**

359 The clustering analysis indicated that the population of neurons as a whole did sustain the color  
360 information throughout the entire trial (Fig. 3A). Plotting the information averages of each of the  
361 three ‘sample-populations’ and the ‘delay-populations’ over time confirmed this result (Fig. 4A,  
362 Supplementary Fig. 6). After the onset of the stimulus array, the average information exhibited a  
363 sharp increase that peaked roughly 400 ms after stimulus onset and remained at an elevated  
364 level throughout the memory delay, until the choice array appeared. Results obtained from  
365 neurons of the lateral prefrontal cortex of monkeys indicated distinct hemispheric independence  
366 of WM capacity (*Buschman et al., 2011*). This means that increasing ipsilateral load (i.e. load in  
367 the hemifield containing the target for which information is assessed) should affect neuronal



368 processing while increasing contralateral load should not. This effect might be further emphasized  
369 in birds due to the full decussation of their optic nerve (*Husband and Shimizu, 2001*). Parallel to  
370 the behavioral results and in line with the results from monkeys, we found a strong effect of  
371 ipsilateral load on the information maintenance, as there was a sharp drop in information when  
372 the load increased from 1 item to 2 items (Fig. 4A, blue and yellow curves). The addition of a third  
373 item only slightly decreased the maintained information further (Fig. 4A, red curve). The load  
374 dependence was much more pronounced during the sample period than during the memory delay  
375 where the information remained at a lower elevated level. Notably, the load effect was only  
376 present for ipsilateral manipulations. If the number of items on the contralateral side was  
377 increased, the information encoded about the colors at the favorite location did not change (Fig.  
378 4A, right). To compare our results to the results obtained in monkeys we also applied the method  
379 of (Buschman et al., 2011) for testing the ipsilateral load effect during the sample and delay phase,  
380 by splitting each phase into an early and a late portion (first and second 400 ms of the sample,  
381 and first and second 500 ms for the delay). We did find a significant drop in information with an  
382 increase in load from 1 through 3 in the early ( $F(2,537) = 18.73, p < .001, \omega^2 = 0.0616$ ) and late  
383 ( $F(2,536) = 20.07, p < .001, \omega^2 = 0.0661$ ) sample period and the early ( $F(2,267) = 6.88, p = .0012,$   
384  $\omega^2 = 0.0417$ ) and late ( $F(2,267) = 3.85, p = .0225, \omega^2 = 0.0207$ ) delay period (Fig. 4B). There  
385 was a large and significant drop between 1 and 2 items (post hoc Bonferroni corrected multiple  
386 comparisons: early and late sample  $p < .001$ , early delay  $p < .001$ , late delay  $p = 0.0198$ ) and 1  
387 and 3 items (post hoc Bonferroni corrected multiple comparisons: early and late sample  $p < .001$ ,  
388 early delay  $p = 0.019$ , late delay  $p > 0.05$ ) but no difference between loads 2 and 3 (post hoc  
389 Bonferroni corrected multiple comparisons: all  $p > 0.05$ ). The maintenance of a significant amount  
390 of information at higher loads (even for 3 items, early sample  $t(156) = 7.55, p < .001$ ; late sample  
391  $t(156) = 8.73, p < .001$ ; early delay  $t(87) = 3.84, p < .001$ ; late delay  $t(87) = 4.73, p < .001$ ) and its  
392 gradual reduction when items were added to the corresponding hemifield are indicative of a  
393 flexible resource allocation and not an all-or-nothing slot-like WM. Furthermore, if there is a  
394 flexible resource, in error trials a small but insufficient amount of resource might still be allocated  
395 to an item.

396 Indeed, error trial analysis (applying correct trial sub-sampling, see methods) for the load 2 & 3  
397 conditions further supported this interpretation. The amount of information in the early and late  
398 sample phase remained above zero (load 2: early,  $t(186) = 3.25, p = 0.0014$ ; late,  $t(186) = 5.33,$   
399  $p < .001$ ; load 3:  $t(156) = 4.21, p < .001$ ; Fig. 4B asterisks), and was significantly smaller than in  
400 correct trials (load 2: late,  $t(186) = 2.81, p = .0055, d = 0.26$ ; load 3: late  $t(156) = 2.55, p = .0117,$   
401  $d = 0.23$ ). Additionally, there was no further maintenance throughout the memory delay at any

402 load (Fig. 4B, PEV at load 2 and 3 in error trials delay, all non-significant). This indicates that a  
 403 failure to report which color had changed at higher loads (2 and 3 ipsilateral items) resulted from  
 404 a smaller amount of information encoding during the sample phase that was not maintained  
 405 through the delay.

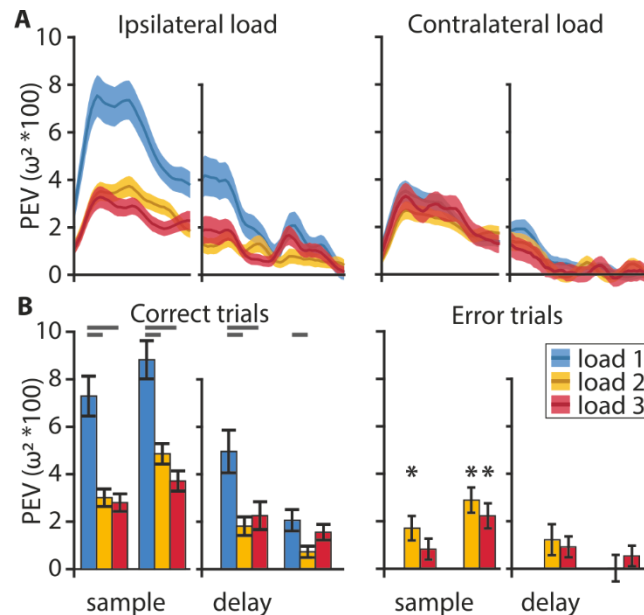

406  
 407 *Figure 4: Information encoding at the population level. (A) Color information (PEV) decreases with an increasing*  
 408 *ipsilateral load but not with an increasing contralateral load. (B) On correct trials (left) color is represented during the*  
 409 *early and late phase of the sample and, to a lesser degree, during the early and late delay. On error trials (right), color*  
 410 *information can be found in the early sample phase at load 2, and in the late sample phase at loads 2 & 3 (asterisks).*  
 411 *Analysis of load 1 error trials was omitted due to their very low abundance. Statistical comparisons of correct vs. error*  
 412 *trial information were performed on sub-sampled correct trials. Early and late sample each 400 ms, early and late delay*  
 413 *each 500 ms, shaded areas, and error bars indicate the standard error of the mean.*

#### 414 **Higher loads produce divisive normalization-like neuronal responses.**

415 We next wanted to understand the neuronal mechanisms behind the information loss at higher  
 416 WM loads. For that, we analyzed how the responses of individual sample- and delay-neurons  
 417 changed when the load increased from 1 color to 2 colors. For the ‘sample-populations’ and the  
 418 ‘delay-populations’, an increasing number of items reduced the amount of encoded information  
 419 about the color identity (Fig. 4). This effect was due to neurons that had a large difference of firing  
 420 rates between the color 1 and color 2 at load 1 (high PEV, i.e. information about color), and  
 421 reduced differentiation at load 2 (small PEV, no or little information about color, e.g. Fig. 2A).  
 422 ‘Divisive-normalization-like regularization’ (DNR, ([Carandini and Heeger, 2012](#))) can explain this  
 423 effect. DNR describes the computation that takes place when two stimuli are presented

424 simultaneously. In a simplified case a neuronal response becomes normalized, analogous to  
425 vector normalization, with a normalization factor consisting of the simultaneous stimuli (*Carandini*  
426 *and Heeger, 2012*). Applied to our context, a consequence of DNR would be a reduced  
427 differentiation between two color identities at load 2 because differences in firing rate (for each  
428 stimulus by itself) at load 1 would be normalized at load 2 (resulting in information loss, e.g., Fig.  
429 2A). We, therefore, hypothesized that DNR was observable for neurons with significant  
430 information at load 1.

431 We tested for DNR in the NCL by calculating a selectivity index (SE) and a sensory interaction  
432 index (SI) for each neuron for the sample phase and the memory delay phase (*Reynolds et al.,*  
433 *1999*), see methods for details). SE indicates how strongly the neuronal response is driven by a  
434 color at the favorite location of the neuron (reference) in relation to a selected probe color (when  
435 either is presented alone). SI indicates how the probe color interacts with the reference color when  
436 both are presented simultaneously. Values of both indices, SE and SI, lie between -1 and +1. The  
437 addition of a probe color influences the response to the reference color by either suppressing the  
438 firing rate of the reference color (if the reference elicits a higher firing rate than the probe, i.e., SE  
439 < 0), or increasing the firing rate for the reference color (if the probe elicits a higher firing rate than  
440 the reference, i.e., SE > 0). If DNR was present, this influence to suppress or enhance neuronal  
441 responses should be an even mixture at the population level, resulting in a significant regression  
442 between SE and SI with a slope of around 0.5 (*Bouchacourt and Buschman, 2019*).

443 We compared regressions for the sample and delay phase (each as one bin, see methods for  
444 details) for two groups of neurons: information-carrying neurons (significant information at load  
445 1), and non-informative neurons (no information at load 1 or at load 2; Supplementary Fig. 7). We  
446 found that DNR was present in both sample and delay phases (Fig. 5A). Information-carrying  
447 sample neurons had a fitted slope of 0.47 ( $R^2_{adj} = .39$ ,  $F(1,838) = 547.69$ ,  $p < .001$ ,  $CI = [0.43$   
448  $0.51]$ ) and delay neurons had a slope of 0.50 ( $R^2_{adj} = .34$ ,  $F(1,342) = 175.60$ ,  $p < .001$ ,  $CI = [0.43$   
449  $0.58]$ ). As the slopes were not significantly different from 0.5, this indicates that reference and  
450 probe color had an equal influence on neuronal responses. We thus show that DNR was  
451 observable in the neuronal population, and as a consequence of this computation, neurons had  
452 generally less information about the color identity at load 2.

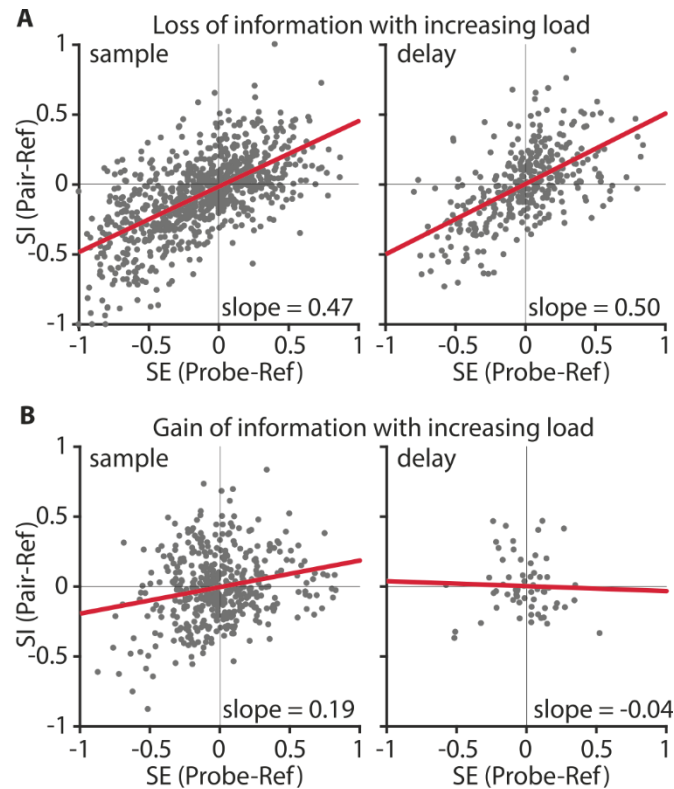

453

454 *Figure 5: Divisive normalization-like regularization was observable for neuronal responses of neurons losing information*  
455 *(A) but not for neurons gaining color information at load 2 (B). Selectivity (SE) indicates how much the neuronal*  
456 *response is influenced by a color, relative to a second color when either is presented alone. Sensory interaction (SI)*  
457 *indicates how much the neuronal response is influenced by either color when both were displayed simultaneously.*  
458 *Slopes close to 0.5 indicate an equal influence of both colors. Slopes < 0.5, or > 0.5 indicate a weighted influence of a*  
459 *color. (A) Information carrying neurons in the sample (n = 105; left) and delay (n = 43; right) population. (B) Information*  
460 *gaining neurons in the sample (n = 56 ; left) and delay (n = 8; right) population. The red line indicates the regression*  
461 *fit.*

## 462 **Gain of information at load 2 can be explained by neuronal normalization.**

463 Some neurons showed encoding of color identity at higher loads, instead of loss of information.  
464 These neurons were abundant in both the sample phase and the delay phase (Fig. 3C). For  
465 example, the neuron shown in figure 2B did not differentiate between color identities at load 1 but  
466 did so for load 2, thus, representing a case of information gain (instead of loss) at a higher load.  
467 We wanted to understand if DNR, the mechanism that we found reduced color information at load  
468 2, could also produce color differentiation. This would be the case if the interaction between the  
469 additional color and the target color is unequal, because neurons without a color differentiation at  
470 load 1 may have gained differentiation at load 2 (e.g. if the interaction of probe color 1 with  
471 reference color 1 is larger than the interaction of probe color 1 with reference color 2). This would

472 result in a population regression slope smaller than 0.5. We thus hypothesized that the population  
473 of neurons showing information at load 2, but not at load 1 (e.g. Fig. 2B), would have a smaller  
474 slope than the neurons that lost information (Fig. 5A). Sample neurons had a slope of 0.19 ( $R^2_{adj}$   
475 = .05,  $F(1,446) = 23.0$ ,  $p < .001$ ,  $CI = [0.11 \ 0.27]$ , Fig. 5B), and delay neurons had a slope of -  
476 0.04 ( $R^2_{adj} = -.015$ ,  $F(1,62) = .08$ ,  $p = .78$ ,  $CI = [-0.29 \ 0.22]$ , Fig. 5B). Both slopes were significantly  
477 smaller than 0.5 and smaller than the slopes of the non-informative neurons (Supplementary Fig.  
478 7). This indicates that these neurons were influenced more strongly by the reference color, and  
479 that the addition of the probe color at load 2 resulted in an unequal interaction. Therefore, DNR  
480 was also computationally responsible for a gain of information at load 2, in a specific subset of  
481 neurons.

482

483

484

485

486

487

488

489

490

491

492

493

494

495

496

497

498

## 499 Discussion

### 500 Neuronal resources of WM capacity are hemifield independent and gradually allocated.

501 Our results confirm behavioral findings that have been discussed in detail in an earlier study  
502 ([Balakhonov and Rose, 2017](#)). In brief, we found that the WM capacity of crows is limited to about  
503 four items, and that the two visual hemifields are largely independent (i.e., the number of items  
504 on one side does not affect change detection performance on the other side). Within each  
505 hemifield, performance dropped gradually with the addition of a second and third item but  
506 remained above chance. Fittingly, on the neuronal level, we found a markedly reduced amount of  
507 color information when the number of colored squares was increased from one to two (roughly 50  
508 % reduction in correct trials). This suggests that WM could be conceptualized as a continuous  
509 resource that has to be divided between the two items ([Bays and Husain, 2008](#); [Berg et al., 2012](#);  
510 [Wilken and Ma, 2004](#)), rather than two ‘simple’ slots that would each have the same amount of  
511 information irrespective of the memory load. In contrast, the hemispheric independence we  
512 observed would fit a slot-like model, in which the hemispheres as a whole act like discrete slots.  
513 A more nuanced version of the slot model (‘slots and averaging’, ([Zhang and Luck, 2008](#))) could  
514 also account for graded amounts of information within a limited number of slots ([Fukuda et al.,](#)  
515 [2010](#); [Zhang and Luck, 2008](#)), as we found here. The mix of discrete and independent  
516 hemispheres with a graded allocation of information between items that we found is comparable  
517 to results by ([Buschman et al., 2011](#)) observed in monkey PFC. On the neuronal level, recurrent  
518 connections between neurons within a hemisphere may reduce item differentiation when multiple  
519 items are present simultaneously, creating capacity limitations within the hemisphere  
520 ([Matsushima and Tanaka, 2014](#)). A lack of interhemispheric recurrent connections would make  
521 processing in the other hemisphere independent. Like in monkeys, WM capacity in crows may  
522 therefore result from neuronal activity patterns governed by multiple individual items.

### 523 Attentional processes guide WM allocation and maintenance.

524 One way to circumvent WM failure when item load increases is to allocate attention. Our results  
525 suggest that attention may play an important role in crow WM. Capacity limitation became  
526 apparent during encoding, as the amount of information at the end of the sample period was  
527 affected by the stimulus load. Adding a second and third item to the ipsilateral stimulus array  
528 reduced the amount of color information encoded by NCL neurons that carried over into the  
529 memory delay. Furthermore, neuronal activity in trials in which the birds made an incorrect  
530 response showed only weak encoding during the sample phase without information maintenance



531 during the memory delay. This fits studies of human WM that have shown attentive filtering during  
532 encoding of stimuli influencing WM capacity (*Bays and Husain, 2008; Vogel et al., 2005; Vogel*  
533 *and Machizawa, 2004*), and neuronal correlates of this have been reported for monkeys as well  
534 (*Buschman et al., 2011*). Furthermore, attention and WM may be directly linked, as neuronal  
535 correlates of WM and attention overlap in PFC neurons (*Lebedev et al., 2004; Panichello and*  
536 *Buschman, 2021*). The independence of hemifields that we observed on the behavioral level (this  
537 study and (*Balakhonov and Rose, 2017*)), and found in the neuronal responses could also be  
538 related to attention. Adding stimuli in the contralateral hemifield affected neither performance nor  
539 information maintained by NCL neurons, whereas additional ipsilateral stimuli strongly reduced  
540 both. This fits the influence of attention on WM and hemifield independence, which is consistently  
541 accentuated in studies in which attention had to be divided between the two hemifields (*Alvarez*  
542 *and Cavanagh, 2005; Buschman et al., 2011; Cavanagh and Alvarez, 2005; Delvenne, 2005;*  
543 *Delvenne et al., 2011*). Finally, the DNR computation can explain the responses of the neurons  
544 that gained information at load 2 through attention. This may appear counter-intuitive and  
545 contradictory, considering that the same process is also responsible for the loss of information.  
546 However, when attention is overtly directed to a specific (preferred or non-preferred) item within  
547 the receptive field of a neuron, the DNR computation shifts its weighting of the normalized  
548 response towards the response of the attended item (*Reynolds et al., 1999; Reynolds and*  
549 *Heeger, 2009*). This weighted normalization can produce a difference in the neuronal response  
550 to both color identities at load 2, even if the neuronal response was non-informative at load 1.  
551 Thus, an attentive process might have enhanced information in WM at higher loads.

552 As we did not use any form of attentional cueing in our study, we cannot explicitly test such an  
553 attention effect. However, we do know that the animals participating in this study can use  
554 attentional cues to enhance their WM (*Fongaro and Rose, 2020*). The attention cues used by  
555 (*Fongaro and Rose, 2020*) positively affected not only encoding but also the maintenance and  
556 retrieval of the information held in WM, comparable to results from monkeys and humans (*Brady*  
557 *and Hampton, 2018; Souza and Oberauer, 2016*). We, therefore, want to emphasize that our data  
558 is in line with the interpretation that the birds possibly attended a load 2 stimulus array differently  
559 than a load 1 stimulus array in order to enhance their performance in trials with higher loads.

## 560 **Modern models of mammalian WM capacity are applicable to crows.**

561 Our neuronal recordings offer a mechanistic explanation for the behavioral effects, as we found  
562 clear evidence of DNR governing the neuronal responses tied to WM capacity that is in  
563 accordance with mammalian models of WM capacity (*Bouchacourt and Buschman, 2019;*

564 [Lundqvist et al., 2016, 2011](#)). The loss of information about color identity (i.e., neuronal response  
565 differentiation between colors) can be accounted for by DNR when an item is added to a neuron's  
566 receptive field. The normalization of neuronal firing rate diminishes the differentiation between  
567 color identities. As such it is analog to neurophysiological responses from visual areas ([Carandini](#)  
568 [et al., 1997](#); [Reynolds et al., 1999](#)) and to the prefrontal cortex during spatial WM ([Matsushima](#)  
569 [and Tanaka, 2014](#)). The WM model of ([Bouchacourt and Buschman, 2019](#)) is based solely on  
570 data from monkey electrophysiology, and thus implicitly tied to the layered columns of the  
571 neocortex. The results we report here show that the model also fits the neurophysiology of WM  
572 in crows. However, the picture is incomplete since important aspects of monkeys' WM are still not  
573 investigated in crows. Oscillations of local field potentials (LFP) are relevant for how information  
574 enters WM and how it is maintained ([Miller et al., 2018](#)), and have been tied to normalization and  
575 competition between items in WM ([Lundqvist et al., 2018](#)). Thus, the oscillatory interplay of the  
576 layers and different regions of the mammalian neocortex are important fields of research to further  
577 our understanding of WM. Such aspects are so far completely unknown in crows and their non-  
578 layered associative areas. This encourages further investigation into the neuronal circuits of WM  
579 in birds.

580 Therefore, while we cannot, yet, fully equate crow and monkey WM, our results raise two  
581 important questions about how WM is implemented on the level of neuronal networks that have  
582 implications for our comparative view of crow WM. The first regards the neuronal computations  
583 underlying WM. Is there a common canonical computation governing WM, or are there different  
584 solutions based on different neuronal architectures? Recent work has shown that the sensory  
585 areas of mammals and birds show remarkably similar circuit organization ([Stacho et al., 2020](#)).  
586 However, higher-order associative areas involved in WM, like the LPFC in mammals and the NCL  
587 in birds, have distinctly different architectures ([Stacho et al., 2020](#)). The fact that differently  
588 organized areas like LPFC and NCL produce strikingly similar physiological responses, points to  
589 shared computational principles. Modeling work already suggests that the competing WM  
590 capacity models can be accommodated into a unifying framework based on theoretical neuronal  
591 information sampling, where stochastic information sampling (assumed for continuous resource  
592 models) can account for item limitations better than fixed information sampling (assumed by the  
593 slots and averaging models) ([Schneegans et al., 2020](#)). Similarly, DNR is already considered to  
594 be a general, canonical computation of the nervous system, present in evolutionarily distant phyla,  
595 e.g. fruit flies and monkeys ([Carandini and Heeger, 2012](#)). The second question regards the  
596 tradeoff between WM flexibility and capacity ([Bouchacourt and Buschman, 2019](#)). Is the WM of a  
597 crow as flexible as that of a monkey? Our results show that the computations by individual

598 neurons that result in WM capacity limitations are virtually the same in crows and monkeys,  
599 highlighting a further aspect of WM that is similar between these animal groups (*Nieder, 2017*).  
600 Ultimately, our results were in line with different modern models of WM that implement DNR to  
601 explain capacity (*Bouchacourt and Buschman, 2019; Lundqvist et al., 2016, 2011; Schneegans*  
602 *et al., 2020*). However, the data we presented cannot carry a definitive conclusion about which of  
603 the different models fits best. For example, a tradeoff between flexibility and capacity  
604 (*Bouchacourt and Buschman, 2019*) might be present, but further investigation into the models'  
605 predictions is required. We do, however, show that mammalian models of WM are in line with WM  
606 in birds, which implies that fundamental aspects of WM are shared between these animal groups.

## 607 **Conclusion.**

608 Together, all these facets of crow WM capacity suggest that the different intricate neuronal  
609 architectures that carry out the computations in monkeys and crows have likely been shaped by  
610 convergent evolution - into systems that yield similar cognitive performances. The systems may  
611 share the same basic mechanisms and thus limitations. Further investigation into the oscillatory  
612 dynamics of WM in the avian brain may elucidate if birds also share the prominent limitation of a  
613 tradeoff between flexibility and capacity.

## 614 **Acknowledgments**

615 We would like to thank Mikael Lundqvist for helpful comments on an earlier version of the  
616 manuscript. This work was supported by a Volkswagen Foundation Freigeist Fellowship  
617 awarded to J.R.

## 618 **Competing interests**

619 The authors declare no competing interests.

## 620 **Author contributions**

621 L.A.H. analyzed the data, performed spike sorting and wrote the manuscript. D.B. performed  
622 animal training and data acquisition. E.F. performed spike sorting. A.N. provided methodological  
623 and infrastructural support and edited the manuscript. J.R. conceptualized, planned, and  
624 supervised the experiment, provided funding, and edited the manuscript.

625

## 626 References

- 627 Alvarez, G.A., Cavanagh, P., 2005. Independent Resources for Attentional Tracking in the Left  
628 and Right Visual Hemifields. *Psychol. Sci.* 16, 637–643. [https://doi.org/10.1111/j.1467-](https://doi.org/10.1111/j.1467-9280.2005.01587.x)  
629 [9280.2005.01587.x](https://doi.org/10.1111/j.1467-9280.2005.01587.x)
- 630 Awh, E., Barton, B., Vogel, E.K., 2007. Visual Working Memory Represents a Fixed Number of  
631 Items Regardless of Complexity. *Psychol. Sci.* 18, 622–628.  
632 <https://doi.org/10.1111/j.1467-9280.2007.01949.x>
- 633 Balakhonov, D., Rose, J., 2017. Crows Rival Monkeys in Cognitive Capacity. *Sci. Rep.* 7, 8809.  
634 <https://doi.org/10.1038/s41598-017-09400-0>
- 635 Bays, P.M., Husain, M., 2008. Dynamic Shifts of Limited Working Memory Resources in Human  
636 Vision. *Science* 321, 851–854. <https://doi.org/10.1126/science.1158023>
- 637 Berg, R. van den, Shin, H., Chou, W.-C., George, R., Ma, W.J., 2012. Variability in encoding  
638 precision accounts for visual short-term memory limitations. *Proc. Natl. Acad. Sci.* 109,  
639 8780–8785. <https://doi.org/10.1073/pnas.1117465109>
- 640 Bouchacourt, F., Buschman, T.J., 2019. A Flexible Model of Working Memory. *Neuron* 103,  
641 147–160.e8. <https://doi.org/10.1016/j.neuron.2019.04.020>
- 642 Brady, R.J., Hampton, R.R., 2018. Post-encoding control of working memory enhances  
643 processing of relevant information in rhesus monkeys (*Macaca mulatta*). *Cognition* 175,  
644 26–35. <https://doi.org/10.1016/j.cognition.2018.02.012>
- 645 Brainard, D.H., 1997. The psychophysics toolbox. *Spat. Vis.* 10, 433–436.  
646 <https://doi.org/10.1163/156856897x00357>
- 647 Buschman, T.J., Siegel, M., Roy, J.E., Miller, E.K., 2011. Neural substrates of cognitive capacity  
648 limitations. *Proc. Natl. Acad. Sci.* 108, 11252–11255.  
649 <https://doi.org/10.1073/pnas.1104666108>
- 650 Carandini, M., Heeger, D.J., 2012. Normalization as a canonical neural computation. *Nat. Rev.*  
651 *Neurosci.* 13, 51–62. <https://doi.org/10.1038/nrn3136>
- 652 Carandini, M., Heeger, D.J., Movshon, J.A., 1997. Linearity and Normalization in Simple Cells of  
653 the Macaque Primary Visual Cortex. *J. Neurosci.* 17, 8621–8644.  
654 <https://doi.org/10.1523/JNEUROSCI.17-21-08621.1997>
- 655 Cavanagh, P., Alvarez, G.A., 2005. Tracking multiple targets with multifocal attention. *Trends*  
656 *Cogn. Sci.* 9, 349–354. <https://doi.org/10.1016/j.tics.2005.05.009>
- 657 Cowan, N., 2017. The many faces of working memory and short-term storage. *Psychon. Bull.*  
658 *Rev.* 24, 1158–1170. <https://doi.org/10.3758/s13423-016-1191-6>
- 659 Cowan, N., 2001. The magical number 4 in short-term memory: A reconsideration of mental  
660 storage capacity. *Behav. Brain Sci.* 24, 87–114.  
661 <https://doi.org/10.1017/S0140525X01003922>
- 662 Delvenne, J.-F., 2005. The capacity of visual short-term memory within and between hemifields.  
663 *Cognition* 96, B79–B88. <https://doi.org/10.1016/j.cognition.2004.12.007>
- 664 Delvenne, J.-F., Kaddour, L.A., Castronovo, J., 2011. An electrophysiological measure of visual  
665 short-term memory capacity within and across hemifields. *Psychophysiology* 48, 333–  
666 336. <https://doi.org/10.1111/j.1469-8986.2010.01079.x>
- 667 Diekamp, B., Gagliardo, A., Güntürkün, O., 2002. Nonspatial and subdivision-specific working  
668 memory deficits after selective lesions of the avian prefrontal cortex. *J. Neurosci.* 22,  
669 9573–9580.
- 670 Fongaro, E., Rose, J., 2020. Crows control working memory before and after stimulus encoding.  
671 *Sci. Rep.* 10, 1–10. <https://doi.org/10.1038/s41598-020-59975-4>
- 672 Fukuda, K., Awh, E., Vogel, E.K., 2010. Discrete capacity limits in visual working memory. *Curr.*  
673 *Opin. Neurobiol., Cognitive neuroscience* 20, 177–182.  
674 <https://doi.org/10.1016/j.conb.2010.03.005>

- 675 Güntürkün, O., Bugnyar, T., 2016. Cognition without Cortex. *Trends Cogn. Sci.* 20, 291–303.  
676 <https://doi.org/10.1016/j.tics.2016.02.001>
- 677 Hartmann, K., Veit, L., Nieder, A., 2018. Neurons in the crow nidopallium caudolaterale encode  
678 varying durations of visual working memory periods. *Exp. Brain Res.* 236, 215–226.  
679 <https://doi.org/10.1007/s00221-017-5120-3>
- 680 Heeger, D.J., 1992. Normalization of cell responses in cat striate cortex. *Vis. Neurosci.* 9, 181–  
681 197. <https://doi.org/10.1017/S0952523800009640>
- 682 Husband, S., Shimizu, T., 2001. Evolution of the Avian Visual System, in: *Avian Visual*  
683 *Cognition [On-Line]*. Available: [Pigeon.Psy.Tufts.Edu/Avc/Husband/](http://Pigeon.Psy.Tufts.Edu/Avc/Husband/).
- 684 Johnson, M.K., McMahon, R.P., Robinson, B.M., Harvey, A.N., Hahn, B., Leonard, C.J., Luck,  
685 S.J., Gold, J.M., 2013. The relationship between working memory capacity and broad  
686 measures of cognitive ability in healthy adults and people with schizophrenia.  
687 *Neuropsychology* 27, 220–229. <https://doi.org/10.1037/a0032060>
- 688 Kornblith, S., Buschman, T.J., Miller, E.K., 2016. Stimulus Load and Oscillatory Activity in  
689 Higher Cortex. *Cereb. Cortex* 26, 3772–3784. <https://doi.org/10.1093/cercor/bhv182>
- 690 Kröner, S., Güntürkün, O., 1999. Afferent and efferent connections of the caudolateral  
691 neostriatum in the pigeon (*Columba livia*): A retro- and anterograde pathway tracing  
692 study. *J. Comp. Neurol.* 407, 228–260. [https://doi.org/10.1002/\(sici\)1096-](https://doi.org/10.1002/(sici)1096-9861(19990503)407:2<228::aid-cne6>3.0.co;2-2)  
693 [9861\(19990503\)407:2<228::aid-cne6>3.0.co;2-2](https://doi.org/10.1002/(sici)1096-9861(19990503)407:2<228::aid-cne6>3.0.co;2-2)
- 694 Lebedev, M.A., Messinger, A., Kralik, J.D., Wise, S.P., 2004. Representation of Attended  
695 Versus Remembered Locations in Prefrontal Cortex. *PLOS Biol.* 2, e365.  
696 <https://doi.org/10.1371/journal.pbio.0020365>
- 697 Luck, S.J., Vogel, E.K., 1997. The capacity of visual working memory for features and  
698 conjunctions. *Nature* 390, 279. <https://doi.org/10.1038/36846>
- 699 Lundqvist, M., Herman, P., Lansner, A., 2011. Theta and Gamma Power Increases and  
700 Alpha/Beta Power Decreases with Memory Load in an Attractor Network Model. *J. Cogn.*  
701 *Neurosci.* 23, 3008–3020. [https://doi.org/10.1162/jocn\\_a\\_00029](https://doi.org/10.1162/jocn_a_00029)
- 702 Lundqvist, M., Herman, P., Warden, M.R., Brincat, S.L., Miller, E.K., 2018. Gamma and beta  
703 bursts during working memory readout suggest roles in its volitional control. *Nat.*  
704 *Commun.* 9, 394. <https://doi.org/10.1038/s41467-017-02791-8>
- 705 Lundqvist, M., Rose, J., Herman, P., Brincat, S.L., Buschman, T.J., Miller, E.K., 2016. Gamma  
706 and Beta Bursts Underlie Working Memory. *Neuron* 90, 152–164.  
707 <https://doi.org/10.1016/j.neuron.2016.02.028>
- 708 Ma, W.J., Husain, M., Bays, P.M., 2014. Changing concepts of working memory. *Nat. Neurosci.*  
709 17, 347–356. <https://doi.org/10.1038/nn.3655>
- 710 Matsushima, A., Tanaka, M., 2014. Different Neuronal Computations of Spatial Working  
711 Memory for Multiple Locations within versus across Visual Hemifields. *J. Neurosci.* 34,  
712 5621–5626. <https://doi.org/10.1523/JNEUROSCI.0295-14.2014>
- 713 Miller, E.K., Lundqvist, M., Bastos, A.M., 2018. Working Memory 2.0. *Neuron* 100, 463–475.  
714 <https://doi.org/10.1016/j.neuron.2018.09.023>
- 715 Nieder, A., 2017. Inside the corvid brain—probing the physiology of cognition in crows. *Curr.*  
716 *Opin. Behav. Sci., Comparative cognition* 16, 8–14.  
717 <https://doi.org/10.1016/j.cobeha.2017.02.005>
- 718 Oberauer, K., Lewandowsky, S., Awh, E., Brown, G.D.A., Conway, A., Cowan, N., Donkin, C.,  
719 Farrell, S., Hitch, G.J., Hurlstone, M.J., Ma, W.J., Morey, C.C., Nee, D.E., Schweppe, J.,  
720 Vergauwe, E., Ward, G., 2018. Benchmarks for models of short-term and working  
721 memory. *Psychol. Bull.* 144, 885–958. <https://doi.org/10.1037/bul0000153>
- 722 Panichello, M.F., Buschman, T.J., 2021. Shared mechanisms underlie the control of working  
723 memory and attention. *Nature* 1–5. <https://doi.org/10.1038/s41586-021-03390-w>



- 724 Reynolds, J.H., Chelazzi, L., Desimone, R., 1999. Competitive Mechanisms Subserve Attention  
725 in Macaque Areas V2 and V4. *J. Neurosci.* 19, 1736–1753.  
726 <https://doi.org/10.1523/JNEUROSCI.19-05-01736.1999>
- 727 Reynolds, J.H., Heeger, D.J., 2009. The Normalization Model of Attention. *Neuron* 61, 168–185.  
728 <https://doi.org/10.1016/j.neuron.2009.01.002>
- 729 Rinnert, P., Kirschhock, M.E., Nieder, A., 2019. Neuronal Correlates of Spatial Working Memory  
730 in the Endbrain of Crows. *Curr. Biol.* 29, 2616-2624.e4.  
731 <https://doi.org/10.1016/j.cub.2019.06.060>
- 732 Rose, J., Colombo, M., 2005. Neural correlates of executive control in the avian brain. *Plos Biol.*  
733 3, 1139–1146. <https://doi.org/10.1371/journal.pbio.0030190>
- 734 Rose, J., Otto, T., Dittrich, L., 2008. The Biopsychology-Toolbox: A free, open-source Matlab-  
735 toolbox for the control of behavioral experiments. *J. Neurosci. Methods* 175, 104–107.  
736 <https://doi.org/10.1016/j.jneumeth.2008.08.006>
- 737 Rossant, C., Kadir, S.N., Goodman, D.F.M., Schulman, J., Hunter, M.L.D., Saleem, A.B.,  
738 Grosmark, A., Belluscio, M., Denfield, G.H., Ecker, A.S., Tolias, A.S., Solomon, S.,  
739 Buzsaki, G., Carandini, M., Harris, K.D., 2016. Spike sorting for large, dense electrode  
740 arrays. *Nat Neurosci* 19, 634–641. <https://doi.org/10.1038/nn.4268>
- 741 Schneegans, S., Taylor, R., Bays, P.M., 2020. Stochastic sampling provides a unifying account  
742 of visual working memory limits. *Proc. Natl. Acad. Sci.* 117, 20959–20968.  
743 <https://doi.org/10.1073/pnas.2004306117>
- 744 Souza, A.S., Oberauer, K., 2016. In search of the focus of attention in working memory:  
745 13 years of the retro-cue effect. *Atten. Percept. Psychophys.* 78, 1839–1860.  
746 <https://doi.org/10.3758/s13414-016-1108-5>
- 747 Stacho, M., Herold, C., Rook, N., Wagner, H., Axer, M., Amunts, K., Güntürkün, O., 2020. A  
748 cortex-like canonical circuit in the avian forebrain. *Science* 369.  
749 <https://doi.org/10.1126/science.abc5534>
- 750 Troscianko, J., von Bayern, A.M.P., Chappell, J., Rutz, C., Martin, G.R., 2012. Extreme  
751 binocular vision and a straight bill facilitate tool use in New Caledonian crows. *Nat.*  
752 *Commun.* 3, 1110. <https://doi.org/10.1038/ncomms2111>
- 753 Veit, L., Hartmann, K., Nieder, A., 2014. Neuronal Correlates of Visual Working Memory in the  
754 Corvid Endbrain. *J. Neurosci.* 34, 7778–7786. <https://doi.org/10.1523/jneurosci.0612-14.2014>
- 755
- 756 Veit, L., Nieder, A., 2013. Abstract rule neurons in the endbrain support intelligent behaviour in  
757 corvid songbirds. *Nat. Commun.* 4, 11. <https://doi.org/10.1038/ncomms3878>
- 758 Vogel, E.K., Machizawa, M.G., 2004. Neural activity predicts individual differences in visual  
759 working memory capacity. *Nature* 428, 748–751. <https://doi.org/10.1038/nature02447>
- 760 Vogel, E.K., McCollough, A.W., Machizawa, M.G., 2005. Neural measures reveal individual  
761 differences in controlling access to working memory. *Nature* 438, 500–503.  
762 <https://doi.org/10.1038/nature04171>
- 763 Waldmann, C., Güntürkün, O., 1993. The dopaminergic innervation of the pigeon caudolateral  
764 forebrain - immunocytochemical evidence for a prefrontal cortex in birds. *Brain Res.* 600,  
765 225–234. [https://doi.org/10.1016/0006-8993\(93\)91377-5](https://doi.org/10.1016/0006-8993(93)91377-5)
- 766 Wilken, P., Ma, W.J., 2004. A detection theory account of change detection. *J. Vis.* 4, 11–11.  
767 <https://doi.org/10.1167/4.12.11>
- 768 Zhang, W., Luck, S.J., 2008. Discrete fixed-resolution representations in visual working  
769 memory. *Nature* 453, 233–235. <https://doi.org/10.1038/nature06860>

770



771 **Supplementary Material**

772

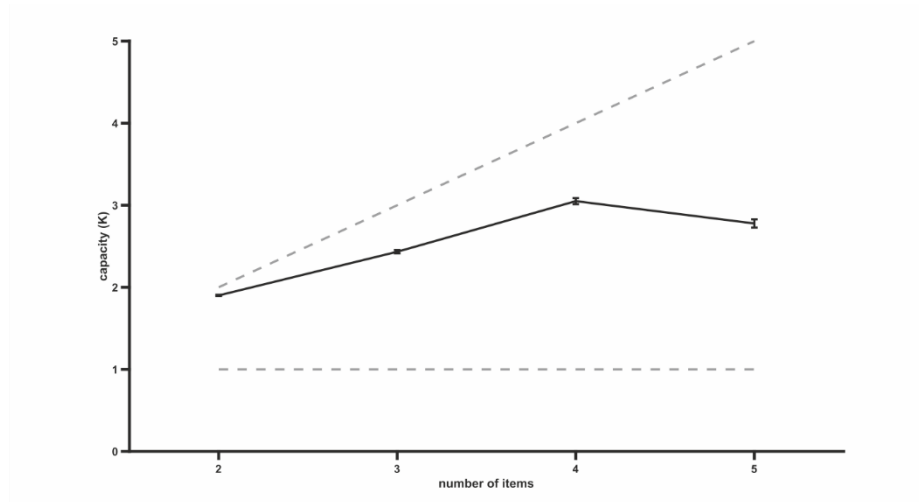

773

774 *Supplementary Figure 1: Capacity of crow WM. Line indicates capacity K at different loads. The peak at 4 items*  
775 *indicates the capacity. Dashed lines indicate maximum capacity and fixed capacity of 1. Error bars indicate the standard*  
776 *error of the mean.*

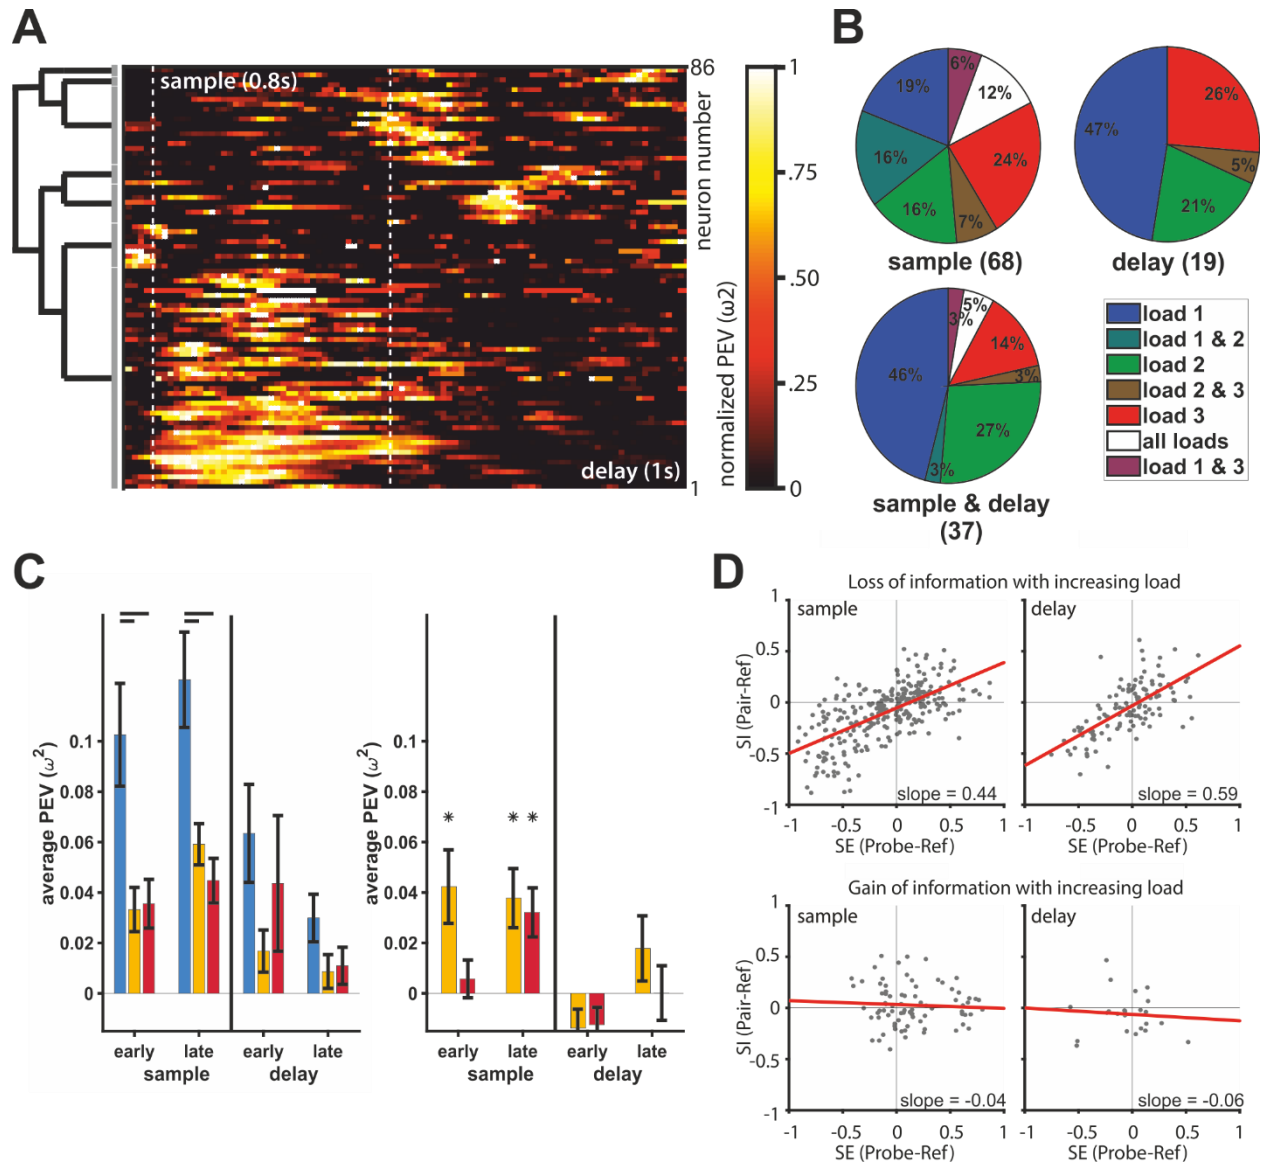

777

778 *Supplementary Figure 2: Overview of analyses for bird 1. (A) The neuronal population can be best described by 7*  
 779 *individual clusters. (B) Percentages (rounded) of significant neurons in individual load conditions for sample (n = 68),*  
 780 *delay (n = 19), and sample & delay (n = 37). (C) On correct trials (left) color is represented during the early and late*  
 781 *phase of the sample and, to a lesser degree, during the early and late delay. On error trials (right), color information*  
 782 *can be found in the early sample phase at load 2, and in the late sample phase at loads 2 & 3 (asterisks). Analysis of*  
 783 *load 1 error trials was omitted due to their very low abundance. Statistical comparisons of correct vs. error trial*  
 784 *information were performed on sub-sampled correct trials. Early and late sample each 400 ms, early and late delay*  
 785 *each 500 ms, error bars indicate the standard error of the mean. (D) Divisive normalization-like regularization was*  
 786 *observable for neuronal responses of neurons losing information (top) but not for neurons gaining color information at*  
 787 *load 2 (bottom). Selectivity (SE) indicates how much the neuronal response is influenced by a color, relative to a second*  
 788 *color when either is presented alone. Sensory interaction (SI) indicates how much the neuronal response is influenced*  
 789 *by either color when both were displayed simultaneously. Slopes close to 0.5 indicate an equal influence of both colors.*  
 790 *Slopes < 0.5, or > 0.5 indicate a weighted influence of a color. (Top) Information carrying neurons in the sample (n =*  
 791 *35; left) and delay (n = 15; right) population. Bottom) Information gaining neurons in the sample (n = 10; left) and delay*  
 792 *(n = 3; right) population. The red line indicates the regression fit.*

793

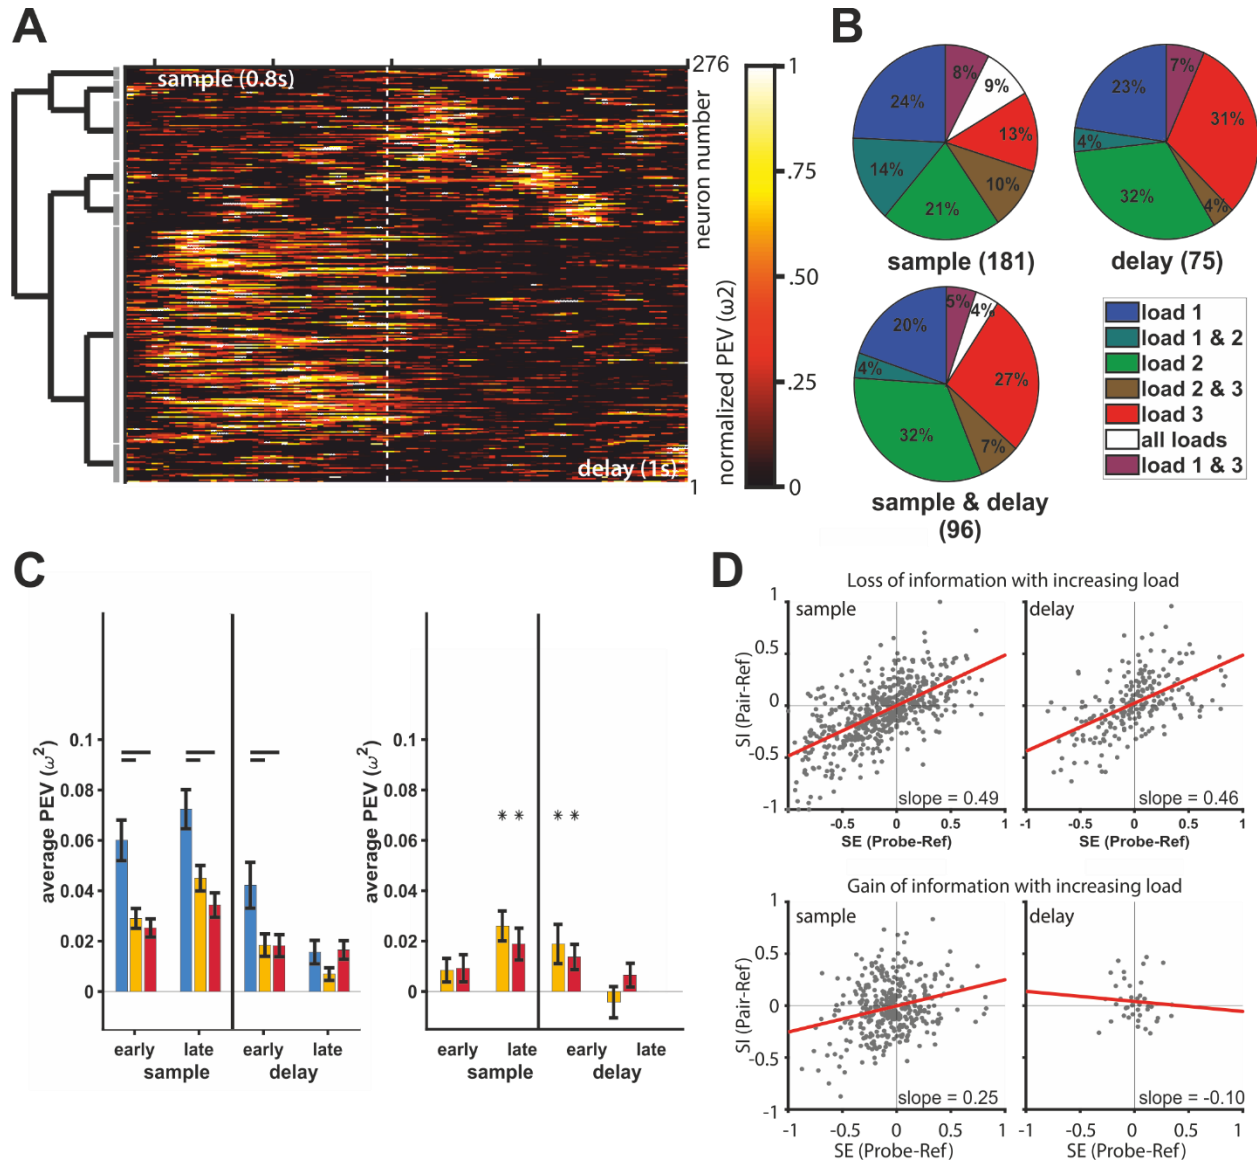

794

795 *Supplementary Figure 3: Overview of analyses for bird 2. (A) The neuronal population can be best described by 7*  
 796 *individual clusters. (B) Percentages (rounded) of significant neurons in individual load conditions for sample (n = 181),*  
 797 *delay (n = 75), and sample & delay (n = 96). (C) On correct trials (left) color is represented during the early and late*  
 798 *phase of the sample and, to a lesser degree, during the early and late delay. On error trials (right), color information*  
 799 *can be found in the late sample phase at loads 2 & 3 (asterisks). Analysis of load 1 error trials was omitted due to their*  
 800 *very low abundance. Statistical comparisons of correct vs. error trial information were performed on sub-sampled*  
 801 *correct trials. Early and late sample each 400 ms, early and late delay each 500 ms, error bars indicate the standard*  
 802 *error of the mean. (D) Divisive normalization-like regularization was observable for neuronal responses of neurons*  
 803 *losing information (top) but not for neurons gaining color information at load 2 (bottom). Selectivity (SE) indicates how*  
 804 *much the neuronal response is influenced by a color, relative to a second color when either is presented alone. Sensory*  
 805 *interaction (SI) indicates how much the neuronal response is influenced by either color when both were displayed*  
 806 *simultaneously. Slopes close to 0.5 indicate an equal influence of both colors. Slopes < 0.5, or > 0.5 indicate a weighted*  
 807 *influence of a color. (Top) Information carrying neurons in the sample (n = 70; left) and delay (n = 28; right) population.*  
 808 *Bottom) Information gaining neurons in the sample (n = 46; left) and delay (n = 5; right) population. The red line indicates*  
 809 *the regression fit.*

810

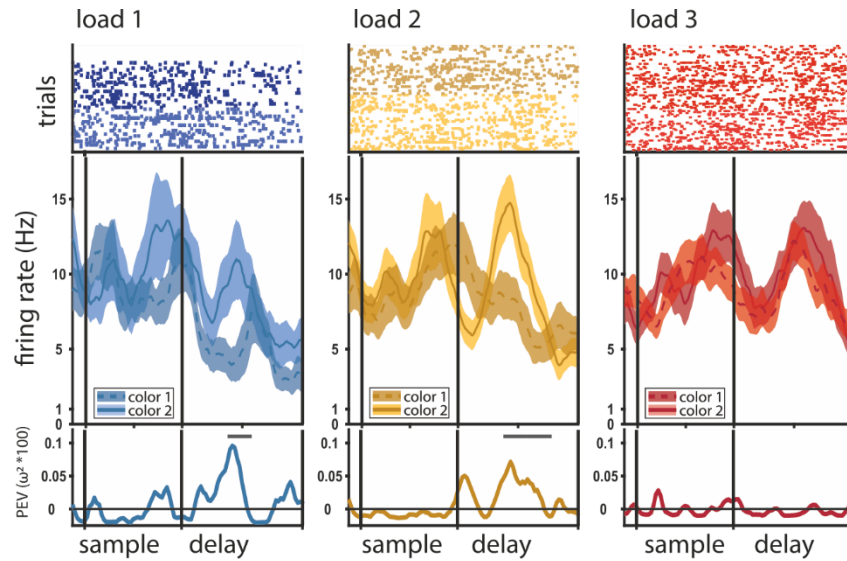

811

812 *Supplementary Figure 4: Color discrimination in the neuronal response (information, PEV) decreases with load. Example*  
 813 *of a delay neuron with color information decline, at load 1 (blue), load 2 (green), and load 3 (red). Top: raster plot,*  
 814 *where every dot represents a single spike during the individual trials (rows of dots); middle: peri-stimulus-time*  
 815 *histogram (PSTH) of average firing rate (solid line for color ID 1, dashed line for color ID 2) with the standard error of the mean*  
 816 *(shaded areas); bottom: percent explained variance of color identity (a measure of information about color) along the*  
 817 *trial, the line at the top of the y-axis indicates significant bins.*

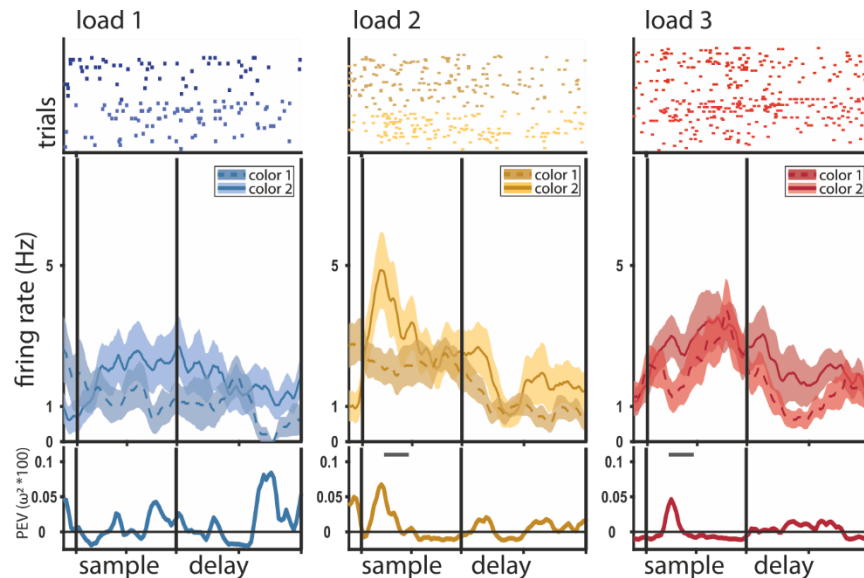

818

819 *Supplementary Figure 5: Color discrimination in the neuronal response (information, PEV) increases with load. Example*  
 820 *of a sample neuron with color information gain; at load 1 (blue), at load 2 (green), and load 3 (red). Top: raster plot,*  
 821 *where every dot represents a single spike during the individual trials (rows of dots); middle: peri-stimulus-time*  
 822 *histogram (PSTH) of average firing rate (solid line for color ID 1, dashed line for color ID 2) with the standard error of*  
 823 *the mean (shaded areas); bottom: percent explained variance of color identity (a measure of information about color)*  
 824 *along the trial, the line at the top of the y-axis indicates significant bins.*

825 Notably, the ‘delay-populations’ also showed an elevated level of information during the sample,  
 826 whereas the ‘sample-populations’ did not show an elevated level of information during the delay  
 827 (Supplementary Fig. 4).

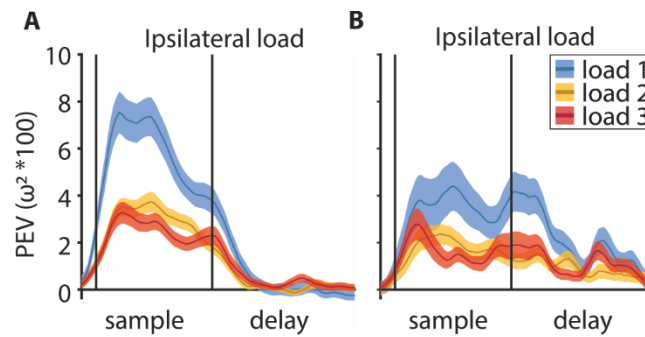

828

829 *Supplementary Figure 6: Sample population (A) and delay population (B), same as Fig. 4A with full time axis.*

830 Non-informative sample neurons had a fitted slope of 0.38 ( $R^2_{adj} = .16$ ,  $F(1,1366) = 258.08$ ,  $p <$   
 831  $.001$ ), significantly smaller than 0.5 ( $CI = [0.33\ 0.42]$ ). Delay neurons had a slope of 0.40, also  
 832 significantly smaller than 0.5 ( $R^2_{adj} = .13$ ,  $F(1,1366) = 197.51$ ,  $p <$   $.001$ ,  $CI = [0.35\ 0.46]$ ). This  
 833 indicates that for these neurons the reference color influenced firing rate more than the probe  
 834 color. This smaller slope is not related to the amount of information encoded for the individual  
 835 colors (which determined the favorite location). It does however indicate those non-informative  
 836 neurons were influenced by any color at their favorite location and thereby might have been  
 837 informative about if the favorite location had a color but not about what color.

838

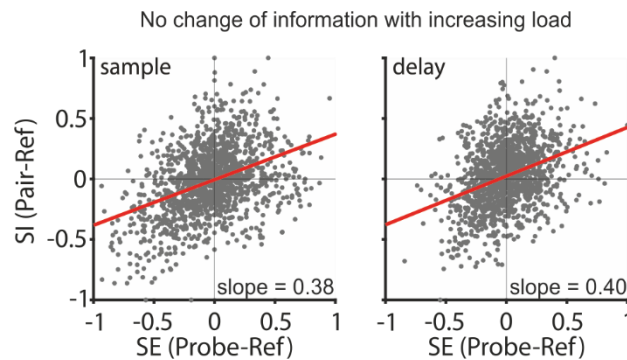

839

840 *Supplementary Figure 7: Divisive normalization-like regularization was observable for neuronal responses of neurons*  
 841 *without significant information. Both phases contain the same neurons ( $n = 171$ ). Selectivity (SE) indicates how much*  
 842 *the neuronal response is influenced by a color, relative to a second color when either is presented alone. Sensory*  
 843 *interaction (SI) indicates how much the neuronal response is influenced by either color when both were displayed*  
 844 *simultaneously. Slopes close to 0.5 indicate an equal influence of both colors. Slopes  $< 0.5$ , or  $> 0.5$  indicate a*  
 845 *weighted influence of a color. The red line indicates the regression fit.*
